# Supplementary material for: Immunogenic cell death after combined treatment with radiation and ATR inhibitors is dually regulated by apoptotic caspases
Source: PubMed Central journal article supplement (PMC10279842; doi:10.3389/fimmu.2023.1138920), 2023-06-06
Supplement: DataSheet_1.pdf [file DataSheet_1.pdf]

**A**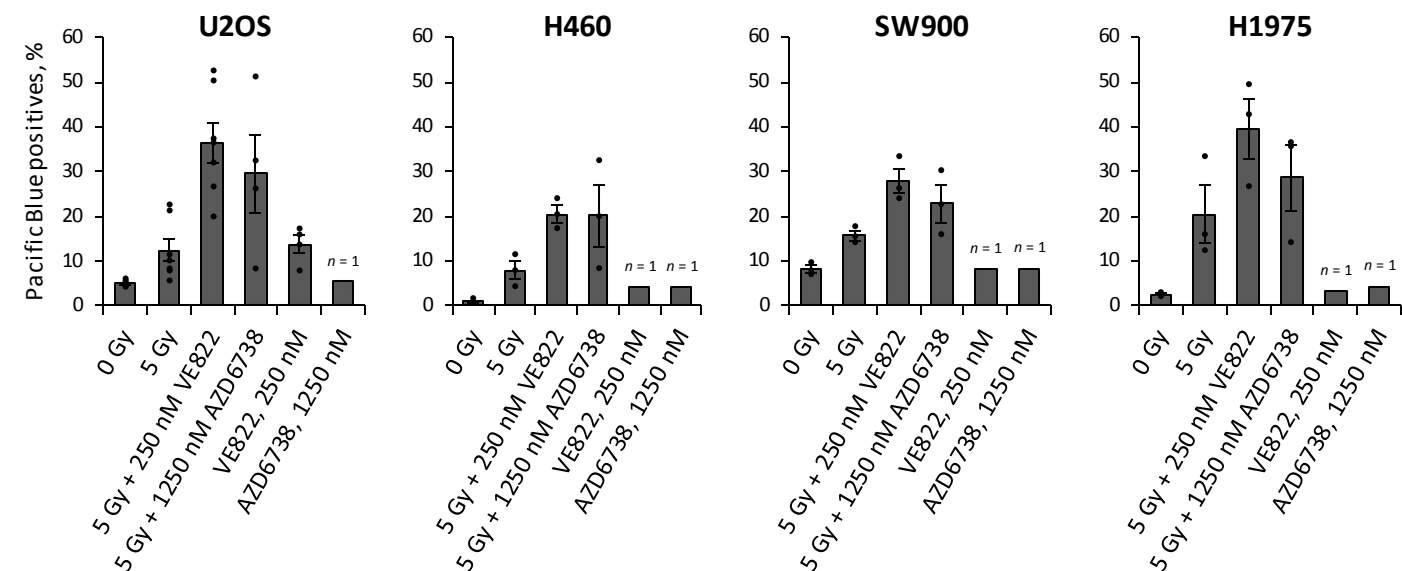**B**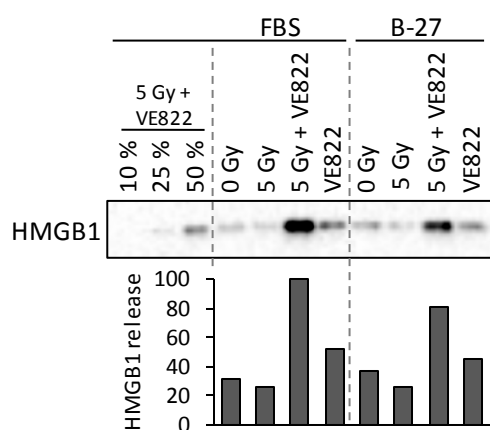**C**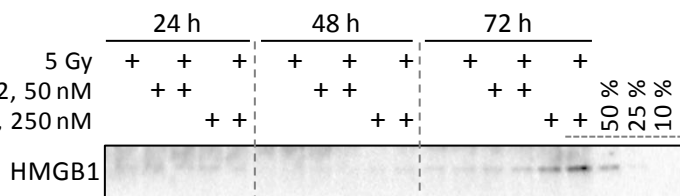**D**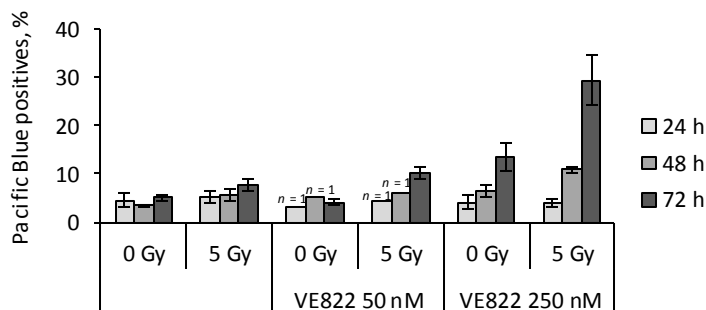

**Supplementary figure S1. A)** Percentage of non-viable cells (as defined by uptake of Pacific Blue stain) at 72 hours post indicated treatments in U2OS, H460, SW900 and H1975 cells, measured by flow cytometry. **B)** HMGB1 release (measured as in Figure 1) from U2OS cells cultured in medium with FBS and in serum-free medium with the serum substitute B-27. VE822 was employed at 250 nM. Quantification of relative HMGB1 levels in the media (bar chart) was conducted with use of the gradient shown to the left in the immunoblot. Findings were verified by another independent experiment. **C)** Immunoblot showing the HMGB1 released from U2OS cells to the growth medium at different time-points after indicated treatments. **D)** The percentage of non-viable cells in experiments as in (C), measured by flow cytometry as in (A). (Data-points for the 72 hours time-point are also included in the U2OS plot in (A)).

**A**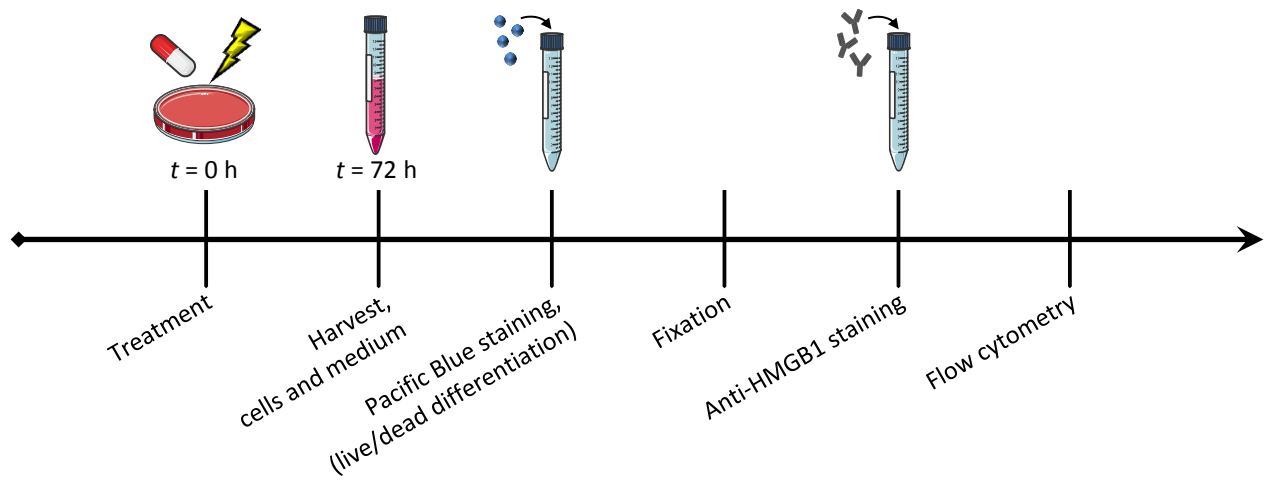**B**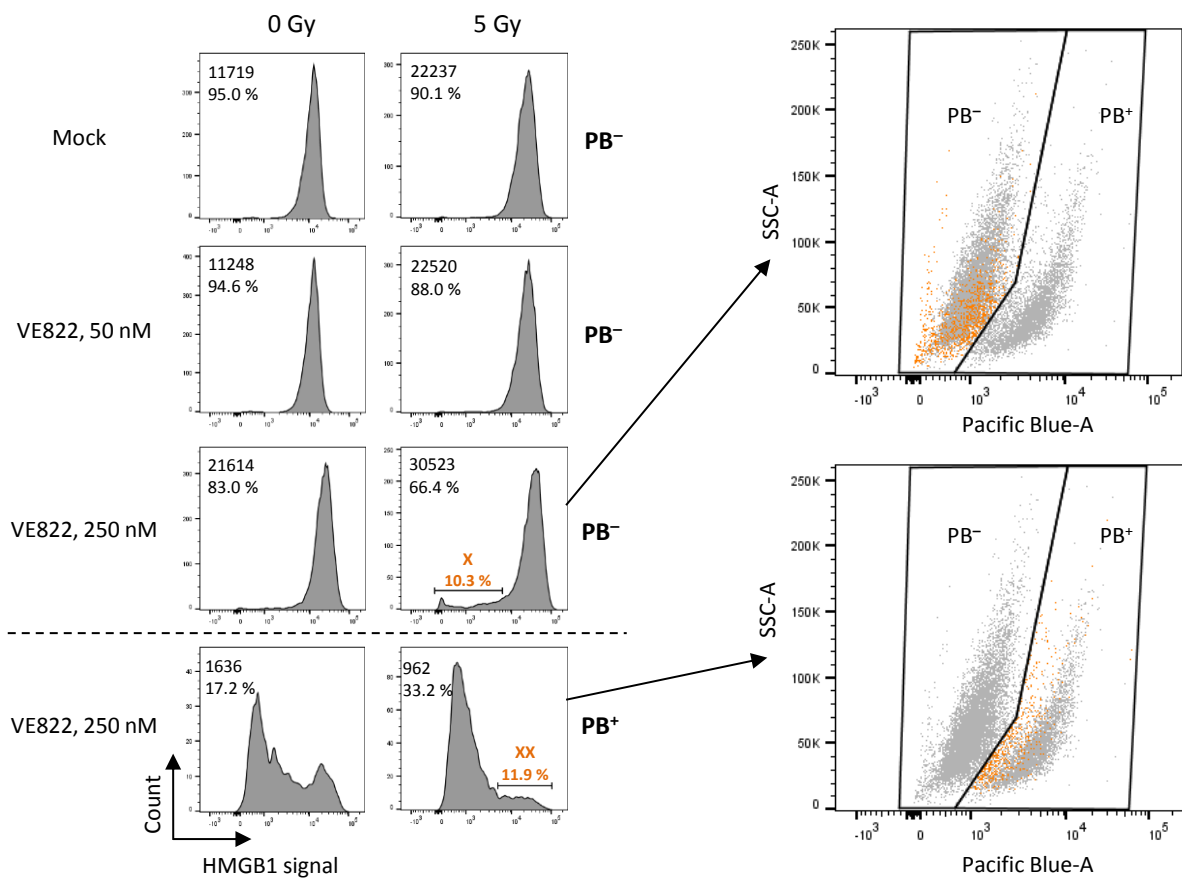

**Supplementary figure S2. A)** Experimental set-up for assessment of HMGB1 levels in viable *versus* non-viable cells. Cell samples were harvested at 72 hours post treatment and stained with Pacific Blue (PB), to indicate lack of plasma membrane integrity (non-viability), before the cells were fixated with formalin, stained with anti-HMGB1 and secondary antibodies and analyzed by flow cytometry. **B)** Histograms of intracellular HMGB1 levels in viable ( $PB^-$ ) and non-viable ( $PB^+$ ) U2OS cells. Note that for the sample treated with 5 Gy + 250 nM VE822, viable cells ( $PB^-$ ) have a high-signal peak with a low-signal tail, whereas non-viable cells ( $PB^+$ ) have a low-signal peak with a high-signal tail. This suggests that HMGB1 release is a process that mainly occurs in non-viable cells (probably due to rupture of the plasma membrane), but also to some degree occur in viable (but dying) cells prior to loss of plasma membrane integrity. Numbers in histograms represent median HMGB1 value and population size (in percentage of total number of single cells). Cells constituting the ‘tail values’ (labelled X and XX in the histograms) are indicated with orange color in the dot plots to the right. Results are shown for a representative experiment ( $n = 3$ ).

**A**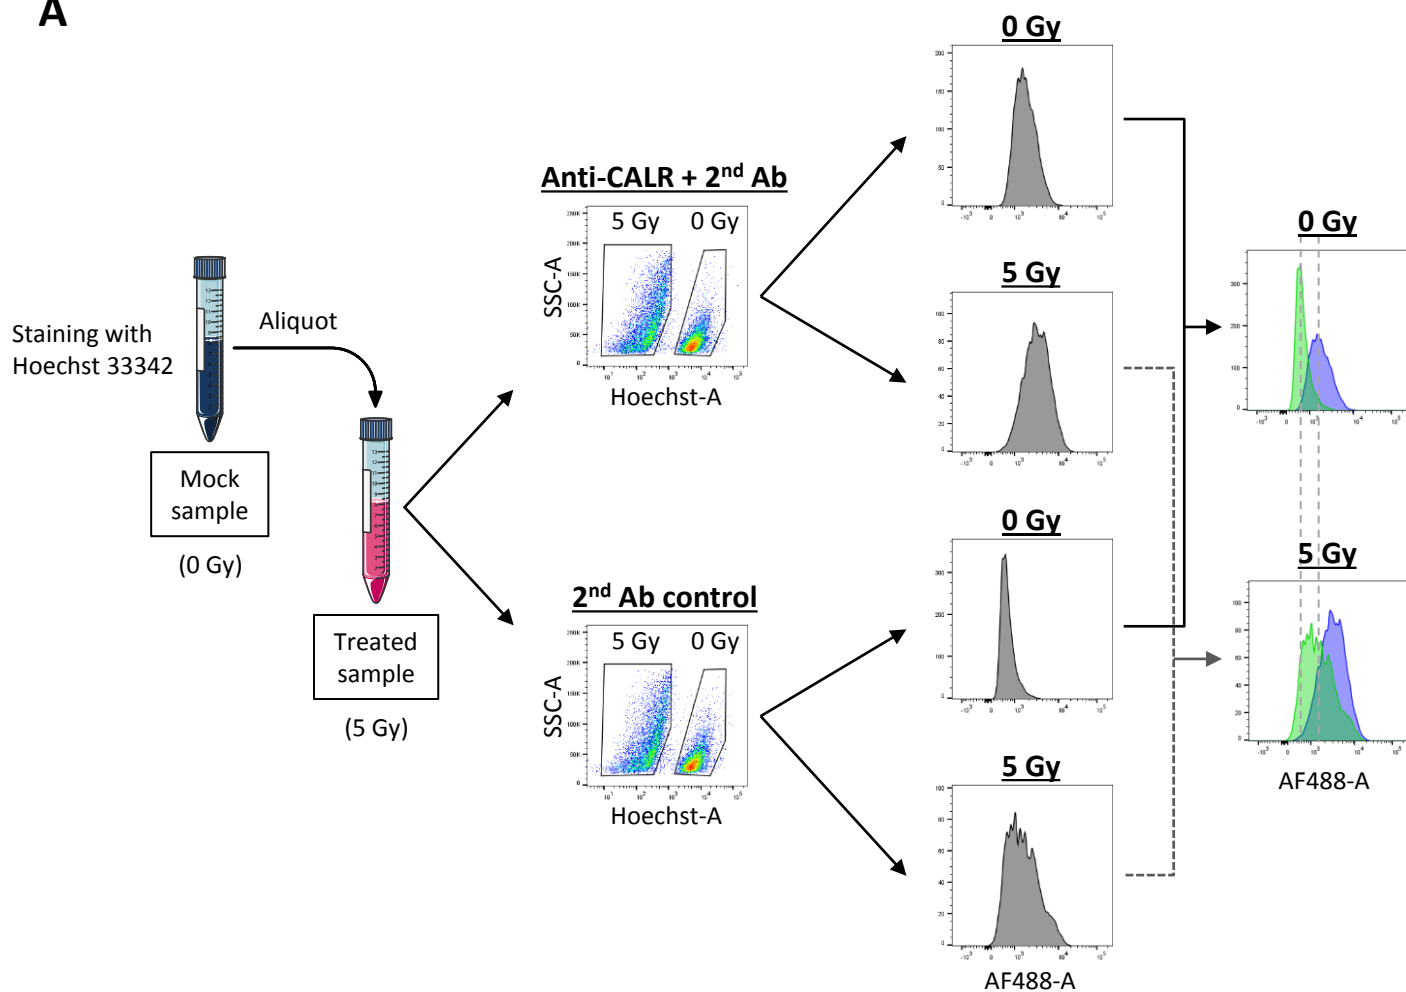**B**

|      | Anti-CALR + 2 <sup>nd</sup> Ab | 2 <sup>nd</sup> Ab control |
|------|--------------------------------|----------------------------|
|      | Median, AF488                  | Median, AF488              |
| 0 Gy | 1636                           | 628                        |
| 5 Gy | 2957                           | 1392                       |

**C**

$$\text{Signal}_{\text{ecto-CALR}} = \frac{\text{Signal}_{5 \text{ Gy}} - \text{Background}_{5 \text{ Gy}}}{\text{Signal}_{0 \text{ Gy}} - \text{Background}_{0 \text{ Gy}}} = \frac{2957 - 1392}{1636 - 628} = 1.55$$

**Supplementary figure S3. Exemplified calculation of normalized ecto-CALR signals.** **A)** Flow chart demonstrating how Alexa Fluor 488 (AF488) median values were extracted from each of the barcoded populations of both the primary antibody-stained fraction and the secondary antibody (2<sup>nd</sup> Ab) control fraction from each of the treated samples. The rightmost histograms demonstrate shifts in background signals (green) and primary antibody signals (blue) between the mock population and the treated population. **B)** AF488 median values from each of the histograms shown in (A), for further use in calculation of ecto-CALR signal. **C)** Example of calculation of ecto-CALR signal normalized to the internal mock control, demonstrated with values from (A) and (B). Data material used in (A-C) is from one of the data point for H1975 presented in Figure 3C.
